# Supplementary material for: EmeticBacillus cereusAre More Volatile Than Thought: Recent Foodborne Outbreaks and Prevalence Studies in Bavaria (2007–2013)
Source: Hindawi journal article supplement (doi:10.1155/2014/465603), 2014-01-01
Supplement: f1 [file 465603.f1.pdf]

1 Supporting information

2 Figures S1, S2, S3: Examples of foods categorized being at low risk (S1), at risk (S2)  
3 and at high risk (S3) to promote cereulide formation in the presence of emetic *B.*  
4 *cereus* strains.

5

6 Fig: S1: low risk foods

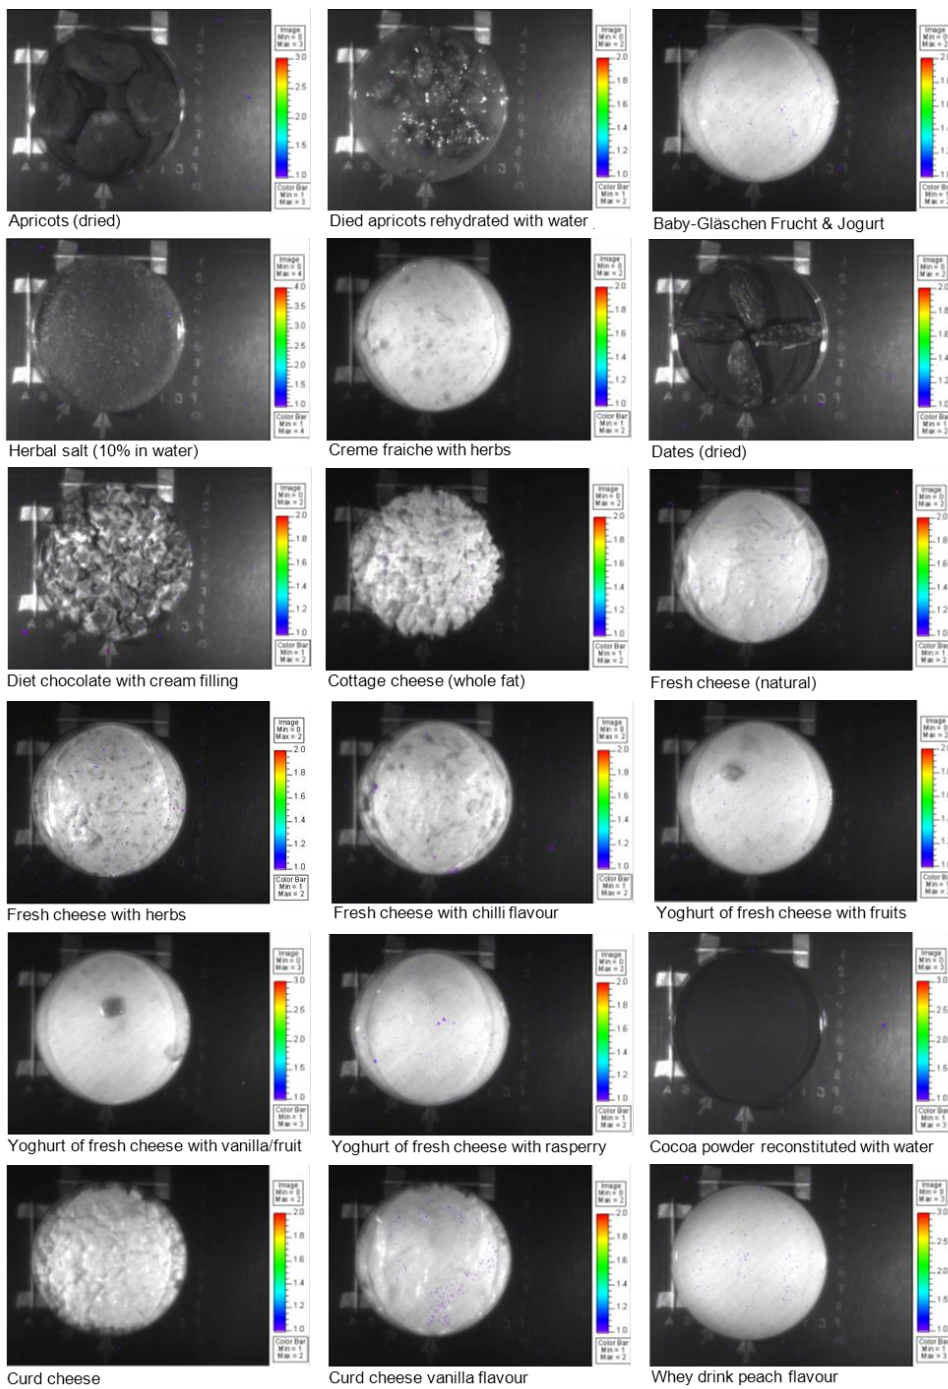

7

8

9 Fig: S2: risk foods

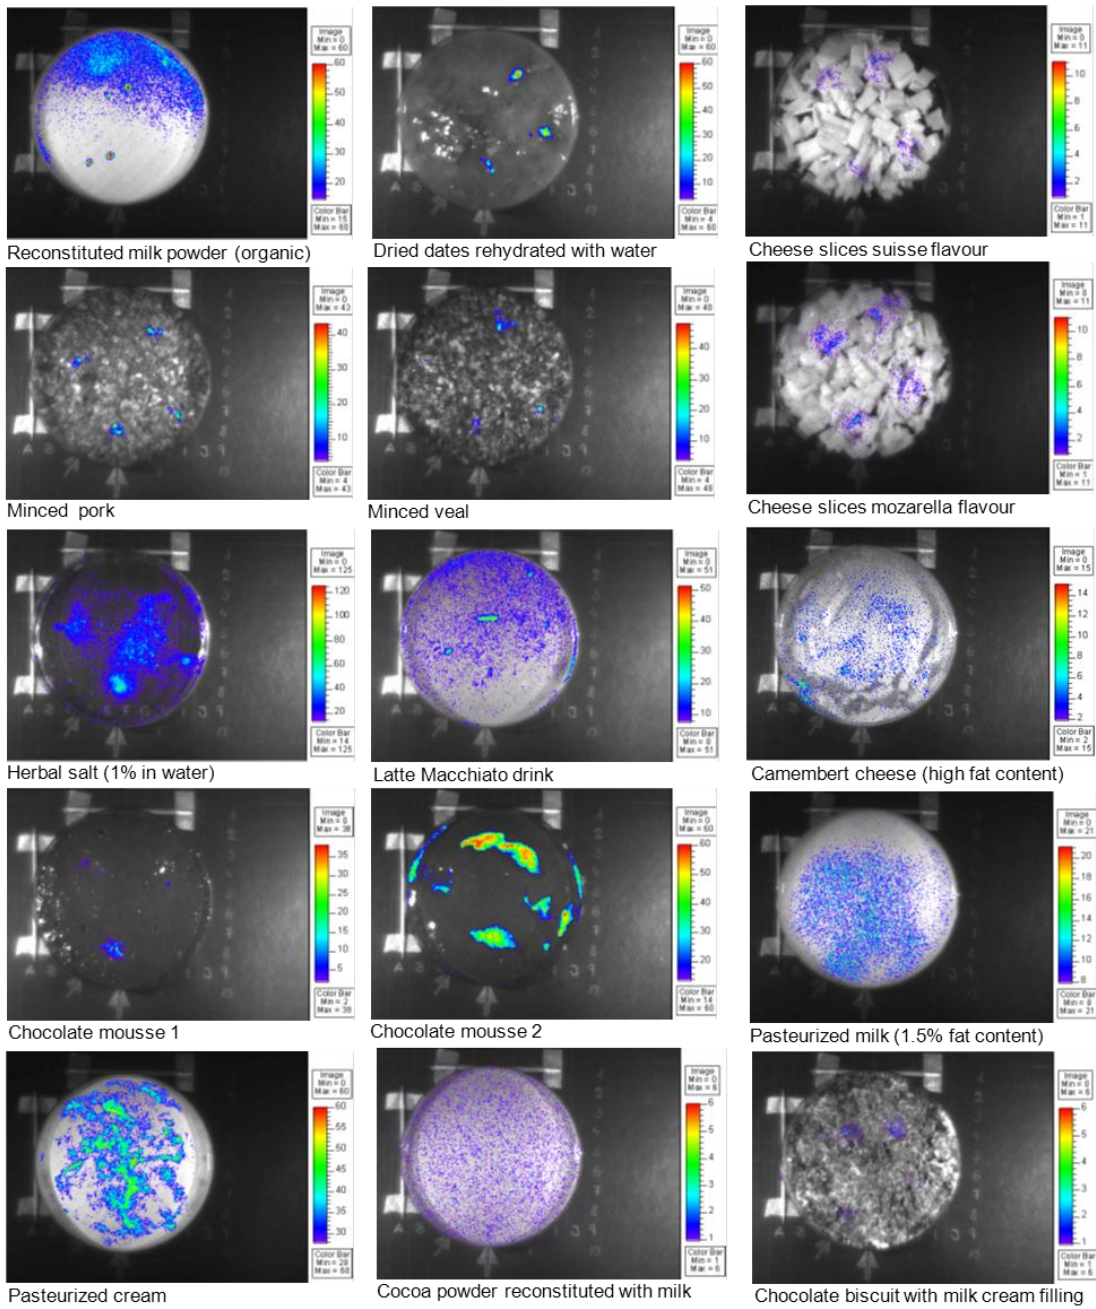

10

11

12

13

14

15

16

17

18 Fig: S3: high risk foods

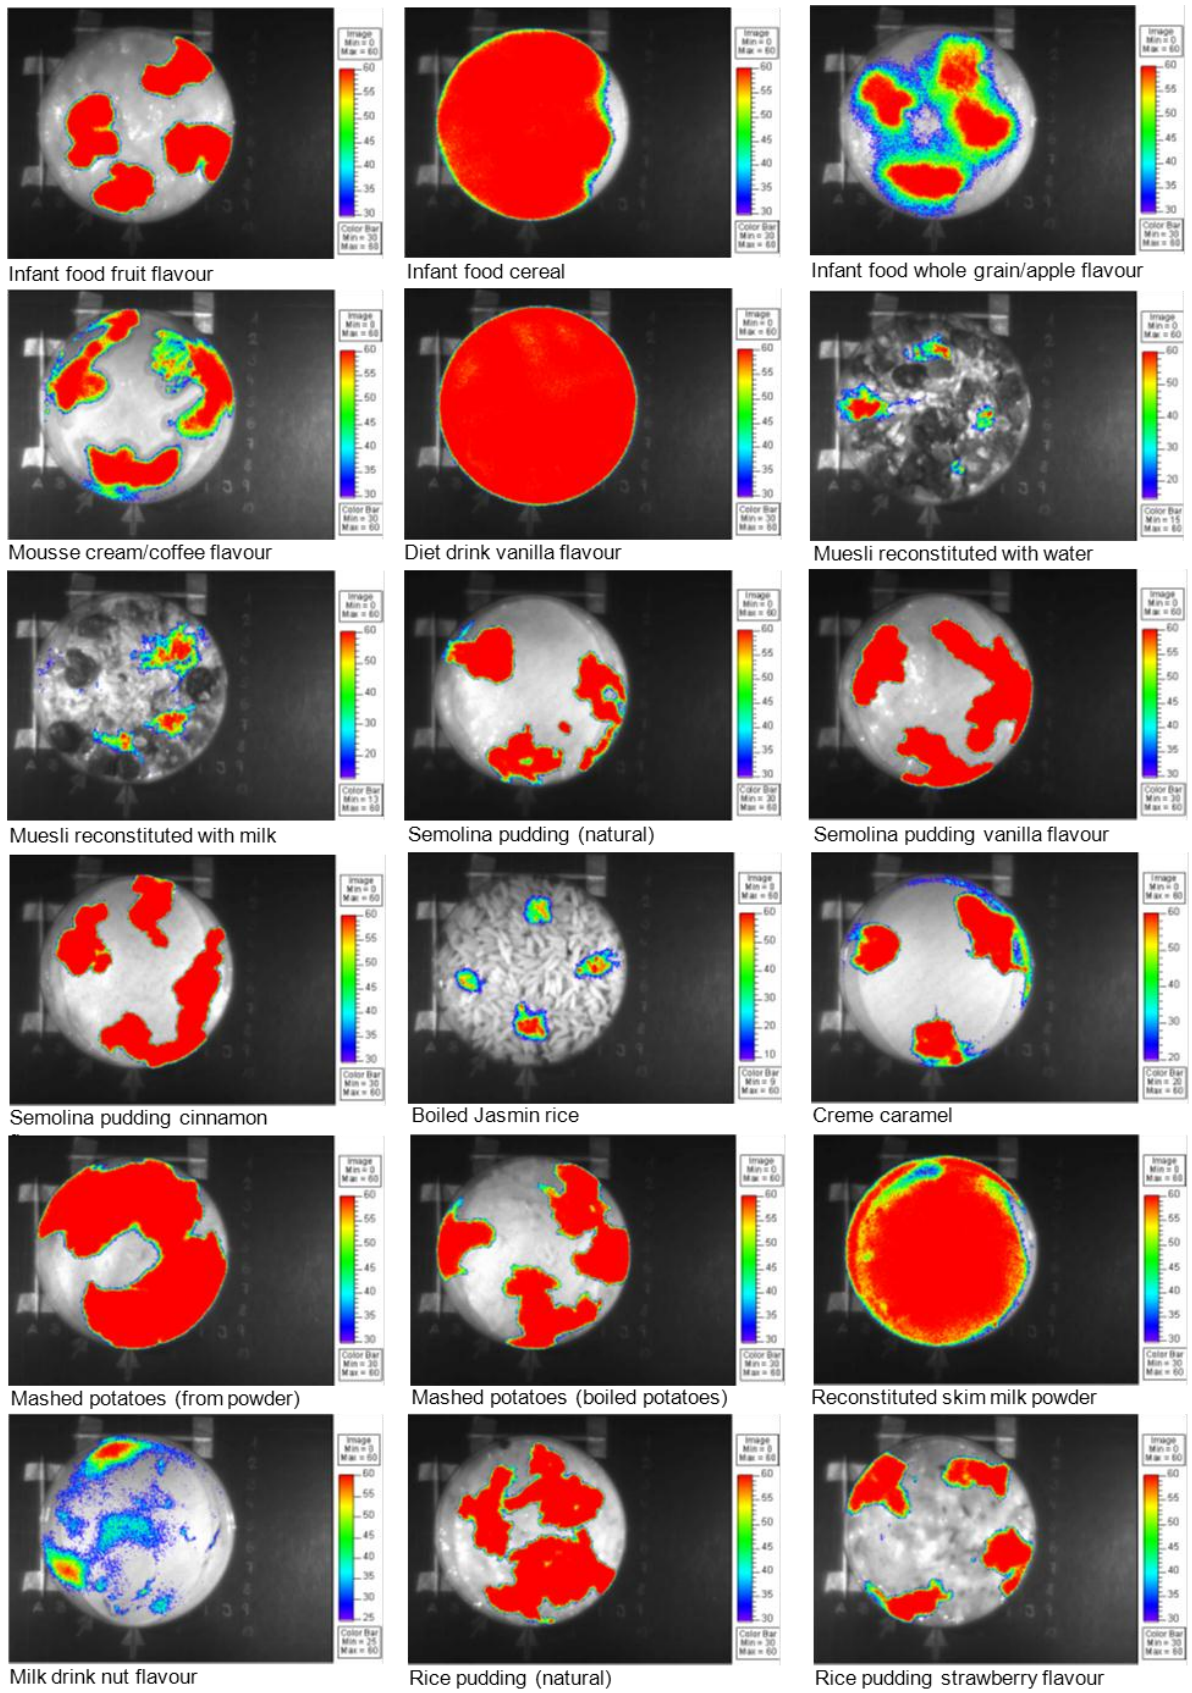

19

20

21 **Table S1.** Threshold values for software-assisted categorization of food products  
22 regarding their potential to support cereulide synthesis<sup>a</sup>

---

| Food category | Mean ROI sum | Minimal ROI sum | Maximal ROI sum |
|---------------|--------------|-----------------|-----------------|
| Low risk      | 5.2E+02      | 4.2E+01         | 8.3E+02         |
| Risk          | 2.9E+04      | 1.3E+03         | 6.7E+04         |
| High risk     | 3.8E+06      | 2.1E+05         | 9.7E+06         |

---

23 <sup>a</sup> A set of 70 retail foods was inoculated with a *lux*-based *B. cereus* reporter strain for  
24 monitoring cereulide synthesis. Bioluminescence imaging was carried out with an  
25 ICCD camera system. The total photon count was quantified *via* region of interest  
26 (ROI) analysis as described in Material and Methods.

27
